# Supplementary material for: Synthesis of novel lanthanide acylpyrazolonato ligands with long aliphatic chains and immobilization of the Tb complex on the surface of silica pre-modified via hydrophobic interactions
Source: Royal Society of Chemistry journal article supplement (doi:10.1039/c5dt01964h), 2015-01-01
Supplement: c5dt01964h1.pdf [file c5dt01964h1.pdf]

Electronic supplementary information

## Synthesis of novel lanthanide acylpyrazolonato ligands with long aliphatic chains and immobilization of the Tb complex on the surface of silica pre-modified via hydrophobic interactions

C. Pettinari,<sup>a</sup> F. Marchetti,<sup>b</sup> R. Pettinari,<sup>a</sup> Y. A. Belousov,<sup>c</sup> I. V. Taydakov,<sup>d</sup> V. D. Krasnobrov,<sup>c</sup> D.I. Petukhov<sup>e</sup> and A. A. Drozdov<sup>c</sup>

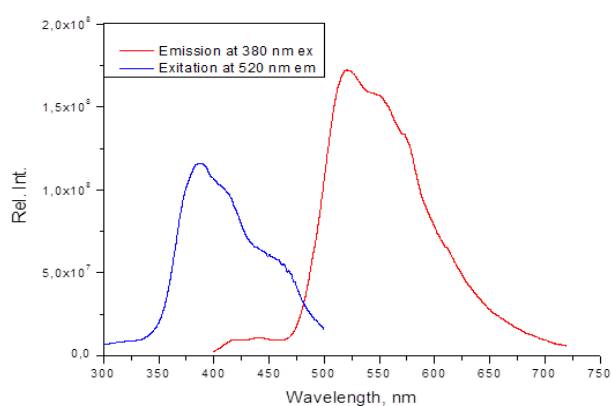

Fig. S1

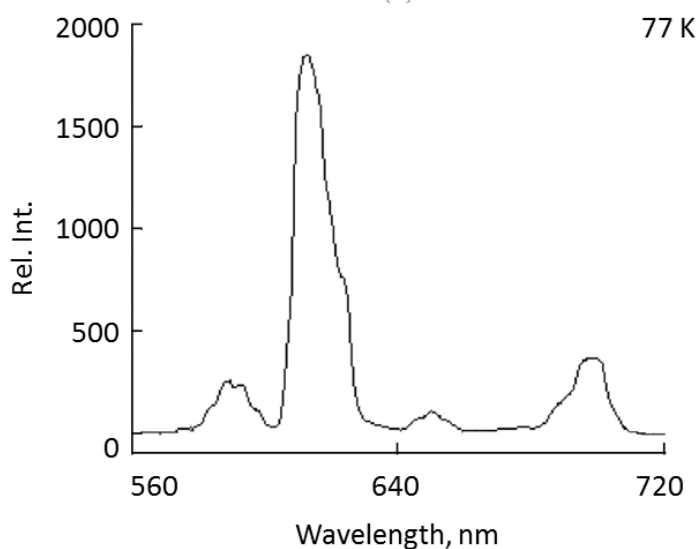

Fig. S2
